# Supplementary material for: Nanoceutical Fabric Prevents COVID-19 Spread through Expelled Respiratory Droplets: A Combined Computational, Spectroscopic and Anti-microbial Study
Source: bioRxiv or medRxiv preprint supplement (doi:10.1101/2021.02.20.432081), 2021-02-22
Supplement: Supplementary file [file media-1.pdf]

## SUPPORTING INFORMATION

### **Nanoceutical Fabric Prevents COVID-19 Spread through Expelled Respiratory Droplets: A Combined Computational, Spectroscopic and Anti-microbial Study**

Aniruddha Adhikari<sup>1</sup>, Uttam Pal<sup>2</sup>, Sayan Bayan<sup>3</sup>, Susmita Mondal<sup>1</sup>, Ria Ghosh<sup>2</sup>, Soumendra Darbar<sup>4</sup>, Tanusri Saha-Dasgupta<sup>2,3,\*</sup>, Samit Kumar Ray<sup>3,5,\*</sup>, Samir Kumar Pal<sup>1,2,\*</sup>

<sup>1</sup>Department of Chemical, Biological and Macromolecular Sciences, S. N. Bose National Centre for Basic Sciences, Block JD, Sector 3, Salt Lake, Kolkata 700106, India

<sup>2</sup>Technical Research Centre, S. N. Bose National Centre for Basic Sciences, Block JD, Sector 3, Salt Lake, Kolkata 700106, India

<sup>3</sup>Department of Condensed Matter Physics and Material Sciences, S. N. Bose National Centre for Basic Sciences, Block JD, Sector 3, Salt Lake, Kolkata 700106, India

<sup>4</sup>Research & Development Division, Dey's Medical Stores (Mfg.) Ltd, 62, Bondel Road, Ballygunge, Kolkata 700019, India

<sup>5</sup>Department of Physics, Indian Institute of Technology Kharagpur, Kharagpur 721302, India

Corresponding authors' email address:

[skpal@bose.res.in](mailto:skpal@bose.res.in) (SKP)

[tanusri@bose.res.in](mailto:tanusri@bose.res.in) (TSD)

[samit@bose.res.in](mailto:samit@bose.res.in) (SKR)

**Local alignment results between SARS-CoV-2 spike protein and lecA of *P. aeruginosa*.**

The best non-identical alignments are:

|                                            | ls-w | bits | E(1)  | %_id  | %_sim | alen |
|--------------------------------------------|------|------|-------|-------|-------|------|
| 6LZG_B Spike glycoprotein Severe ac ( 209) | 52   | 18.8 | 0.053 | 0.281 | 0.625 | 32   |
| +-                                         | 45   | 16.9 | 0.19  | 0.243 | 0.622 | 37   |
| +-                                         | 35   | 14.1 | 0.76  | 0.281 | 0.562 | 32   |
| +-                                         | 30   | 12.7 | 0.98  | 0.833 | 1.000 | 6    |
| +-                                         | 29   | 12.4 | 0.99  | 0.364 | 0.727 | 11   |
| +-                                         | 29   | 12.4 | 0.99  | 0.500 | 0.562 | 16   |
| +-                                         | 29   | 12.4 | 0.99  | 0.400 | 0.600 | 10   |
| +-                                         | 26   | 11.6 | 1     | 0.214 | 0.571 | 28   |
| +-                                         | 26   | 11.6 | 1     | 0.261 | 0.565 | 23   |
| +-                                         | 26   | 11.6 | 1     | 0.286 | 0.571 | 14   |
| +-                                         | 26   | 11.6 | 1     | 0.308 | 0.769 | 13   |

>>>4YWA\_A|PA-I, 121 aa vs lalign-I20201121-055742-0421-60153165-p2m.bsequence library

>>6LZG\_B|Spike glycoprotein|Severe acute respiratory syn (209 aa)  
 Waterman-Eggert score: 52; 18.8 bits; E(1) < 0.053  
 28.1% identity (62.5% similar) in 32 aa overlap (14-45:149-180)

```

                20      30      40
4YWA_A QVTSIIYNPGDVITIVAAGWASYGPTQKWGPQ
      . . . . . : : : . : : : : : : : :
6LZG_B DISTEIQAGSTPCNGVEGFNCYFPLQSYGFQ
      150      160      170      180
  
```

>--  
 Waterman-Eggert score: 45; 16.9 bits; E(1) < 0.19  
 24.3% identity (62.2% similar) in 37 aa overlap (7-43:92-128)

```

        10      20      30      40
4YWA_A LANNEAGQVTSIIYNPGDVITIVAAGWASYGPTQKWG
      . : : : : : : : : : : : : : : : : :
6LZG_B IAPGQTGKIADYNYKLPDDFTGCVIAWNSNNLDSKVG
      100      110      120
  
```

>--  
 Waterman-Eggert score: 35; 14.1 bits; E(1) < 0.76  
 28.1% identity (56.2% similar) in 32 aa overlap (1-32:34-63)

```

        10      20      30
4YWA_A AWKGEVLANNEAGQVTSIIYNPGDVITIVAAG
      : : . . . : : : : : : . : : :
6LZG_B AwnrKRISNCVADY--SVLYNSASFSTFKCYG
      40      50      60
  
```

>--  
Waterman-Eggert score: 30; 12.7 bits; E(1) < 0.98  
83.3% identity (100.0% similar) in 6 aa overlap (108-113:52-57)

```
      110
4YWA_A NSGSFS
      : : : : :
6LZG_B NSASFS
```

>--  
Waterman-Eggert score: 29; 12.4 bits; E(1) < 0.99  
36.4% identity (72.7% similar) in 11 aa overlap (68-78:153-163)

```
      70
4YWA_A KIGNSGTIPVN
      . : . . . : :
6LZG_B EIYQAGSTPCN
      160
```

>--  
Waterman-Eggert score: 29; 12.4 bits; E(1) < 0.99  
50.0% identity (56.2% similar) in 16 aa overlap (35-48:176-191)

```
      40
4YWA_A SYG--PTQKWGPQGDR
      : : : : : : :
6LZG_B SYGFQPTNGVGYQPYPYR
      180      190
```

>--  
Waterman-Eggert score: 29; 12.4 bits; E(1) < 0.99  
40.0% identity (60.0% similar) in 10 aa overlap (23-32:86-95)

```
      30
4YWA_A GDVITIVAAG
      : : . . : :
6LZG_B GDEVRQIAPG
      90
```

>--  
Waterman-Eggert score: 26; 11.6 bits; E(1) < 1  
21.4% identity (57.1% similar) in 28 aa overlap (82-108:103-130)

```
      90      100
4YWA_A FRWVAPNNVQG-AITLIYNDVPGTYGNN
      . . : . . : : . . : : :
6LZG_B YNYKLPDDFTGCVIAWNSNNLDSKVGGN
      110      120      130
```

>--  
Waterman-Eggert score: 26; 11.6 bits; E(1) < 1  
26.1% identity (56.5% similar) in 23 aa overlap (83-105:90-111)

```
      90      100
4YWA_A RWVAPNNVQGAITLIYNDVPGTY
      : : : : : : : : :
6LZG_B RQIAPGQT-GKIADYNYKLPDDF
      90      100      110
```

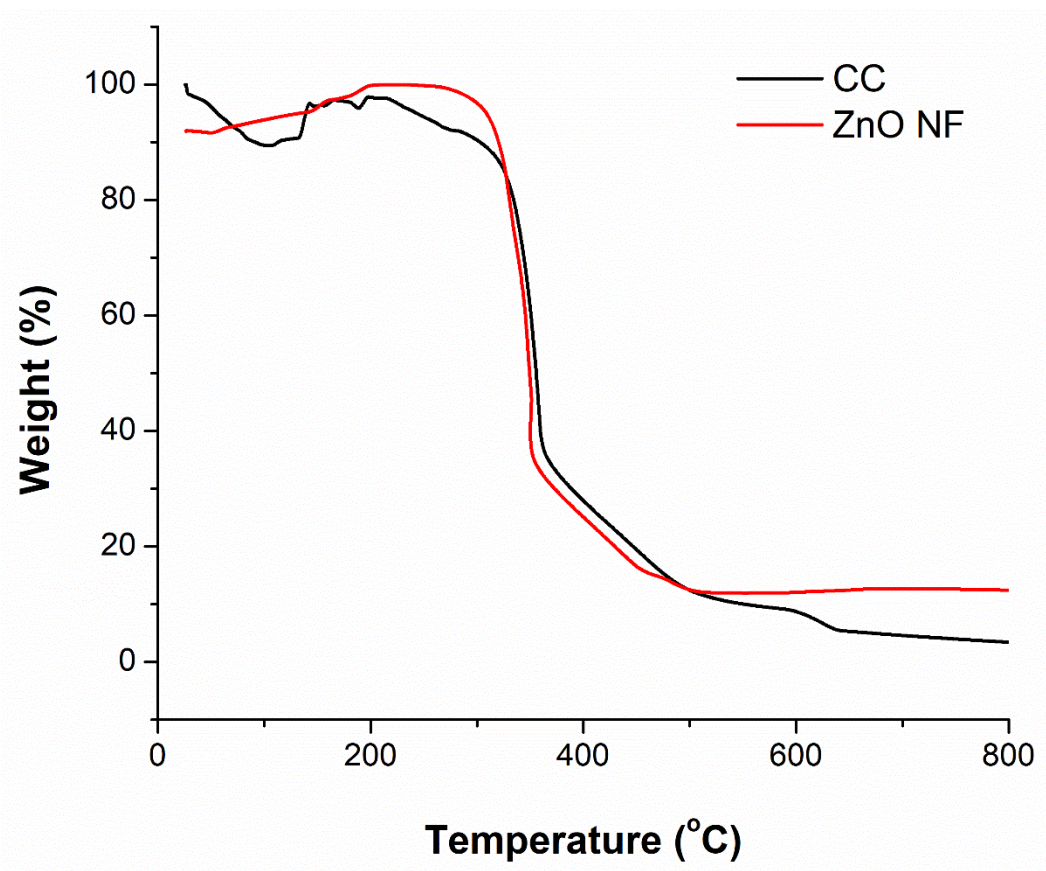

Supplementary Figure S1. TG data of ZnO NF decorated cotton cloth and bare cotton cloth.

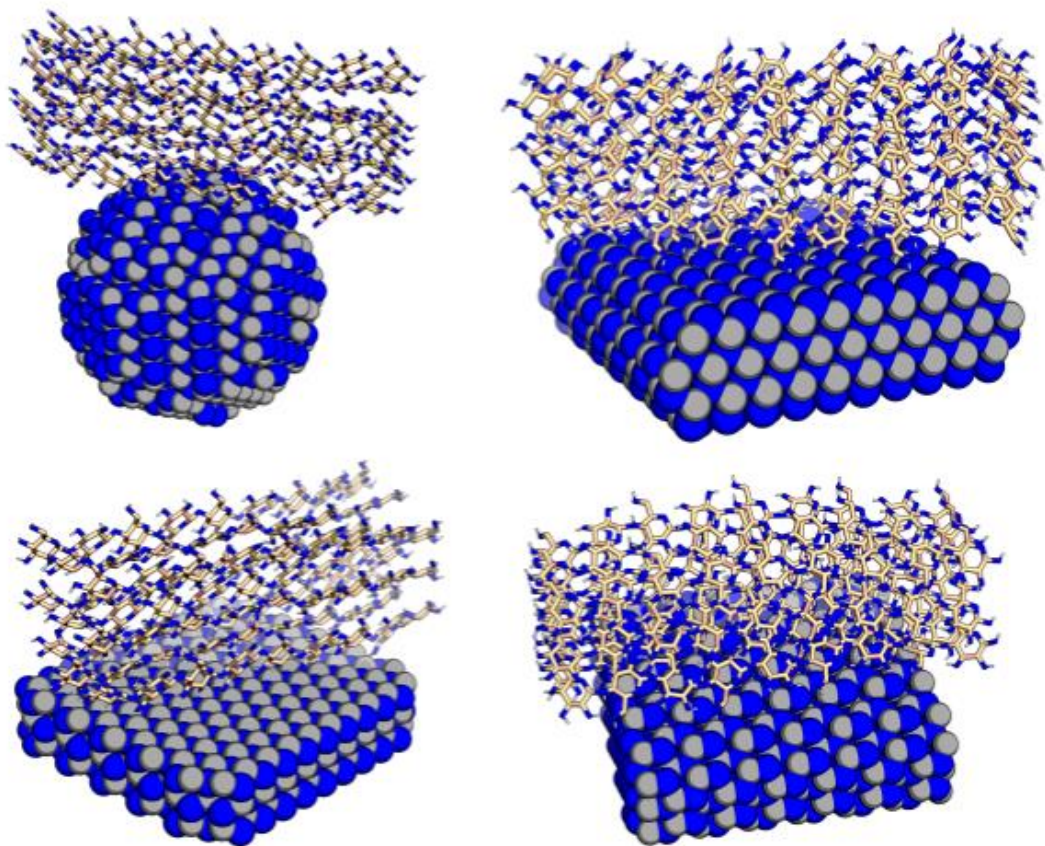

**Supplementary Figure S2. Binding of ZnO with cellulose fiber.**
